# Supplementary material
Source: PubMed Central journal article supplement (PMC3296238)
Supplement: supp_111.134684_FigureS1.pdf [file supp_111.134684_FigureS1.pdf]

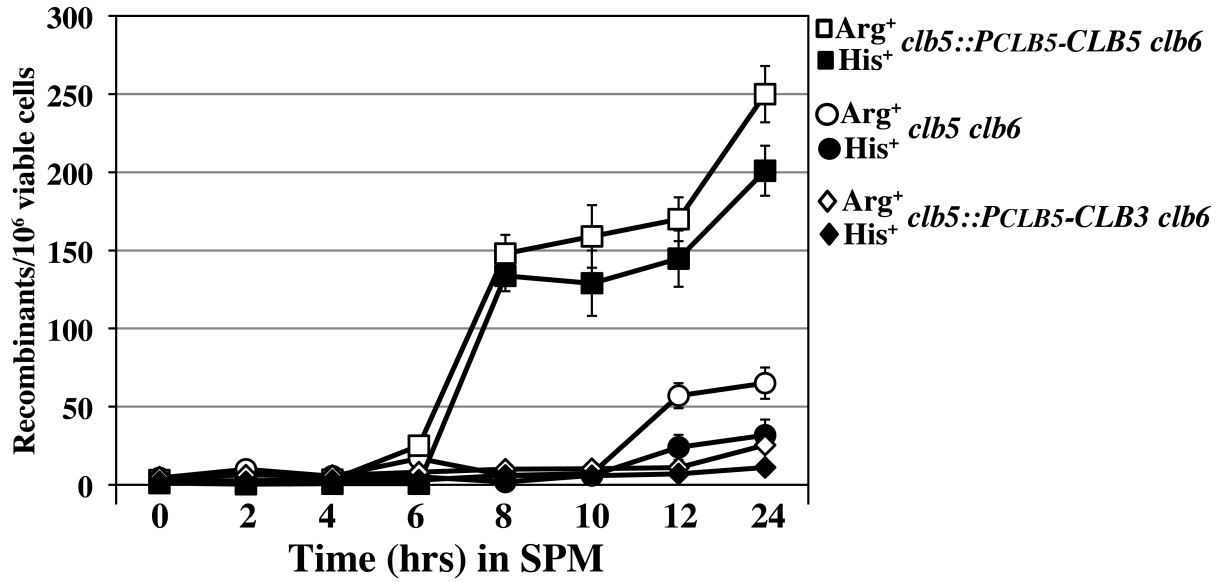

Figure S1 Meiotic recombination at the Arg4 and His4 loci. The yeast strains: *clb5::PCLB5-CLB5 clb6* (square symbols), *clb5 clb6* (circles), and *clb5::PCLB5-CLB3 clb6* (diamonds) were inoculated into SPM and at the indicated times  $1 \times 10^7$  cells were withdrawn and plated to  $-his$  and  $-arg$  medium to determine the number of cells that had undergone recombination at the Arg4 (open symbols) and His4 (filled symbols) loci. An additional  $1 \times 10^2$  cells were plated to YEPD medium to determine the number of viable cell in each culture. The values shown are the means from triplicate platings, and the error bars reflect standard deviations.
